# Supplementary material for: Evaluation of Glycosylated Ferritin in Adult-Onset Still’s Disease and Differential Diagnoses
Source: MDPI journal article supplement (doi:10.3390/jcm11175012), 2022-08-26

## Supplementary Material

Article: *Evaluation of glycosylated ferritin in adult-onset Still's disease and differential diagnoses, by Arthur Guerber et al.*

---

**Supplemental Figure S1. Survival probability without death or intensive care unit admission according to glycosylated ferritin (GF) level**

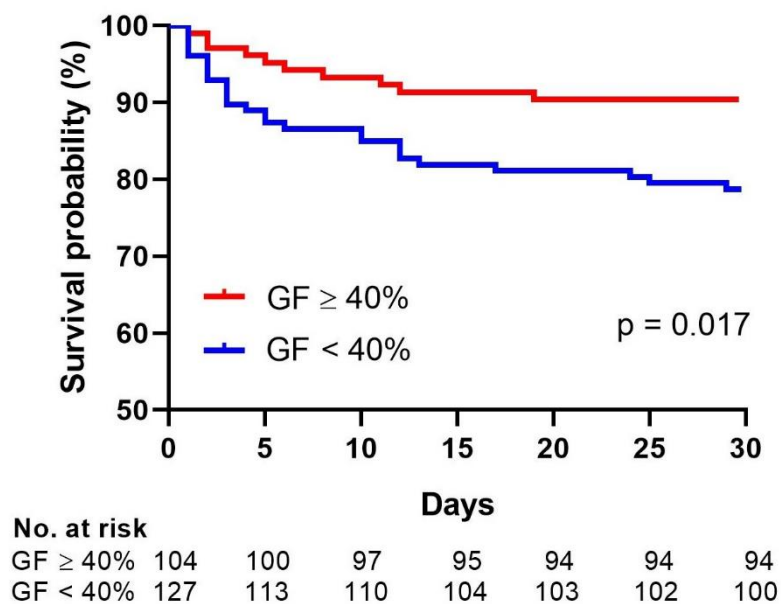

**Supplemental Figure S2. Hemophagocytic lymphohistiocytosis prevalence in hematologic malignancies (n=24) according to glycosylated ferritin (GF) level**

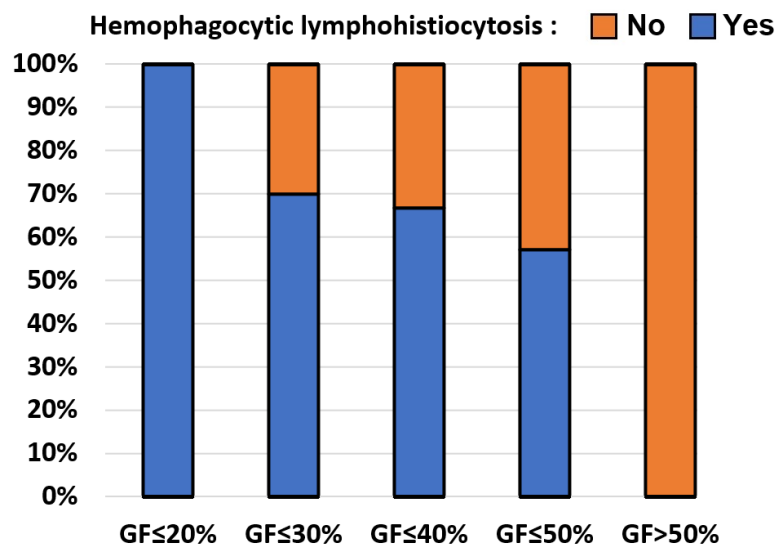

Supplement: s1 [file s1]
